# Supplementary material for: Morphological Transformation of Silver Nanoparticles from Commercial Products: Modeling from Product Incorporation, Weathering through Use Scenarios, and Leaching into Wastewater
Source: MDPI journal article supplement (doi:10.3390/nano9091258), 2019-09-05
Supplement: s1 [file s1]

### **Supporting Information**

Table S1: The test results for raw wastewater composition. Sample 1 of raw wastewater was used for the pristine NPs. Sample 2 of raw waste water was used for the solutions from day-to-day wear of laboratory-prepared socks and pristine NPs.

| Test                        | Units                                | Sample 1 | Sample 2 |
|-----------------------------|--------------------------------------|----------|----------|
| Chemical Oxygen Demand, COD | mg/L                                 | 434      | 495      |
| Total Nitrogen, N           | mg/L N                               | 47       | 51       |
| Total Phosphorus, P         | mg/L PO <sub>4</sub> <sup>3-</sup>   | 28       | 42       |
| Total Sulfate, S            | mg/L SO <sub>4</sub> <sup>-</sup>    | 60       | 87       |
| Ammonia, NH <sub>3</sub> -N | mg/L NH <sub>3</sub> -N              | 30.9     | 33       |
| Nitrate, NO <sub>3</sub> -N | mg/L NO <sub>3</sub> <sup>-</sup> -N | 0.9      | 1*       |
| Turbidity                   | NTU                                  | 35       | 84       |
| Absorbance @254nm           | -                                    | 1.0489   | 1.5692   |
| Total Solids                | mg/L                                 | 1655.6   | 1072.5   |
| Total Volatile Solids       | mg/L                                 | 1189     | 392      |

\*Test performed the following day

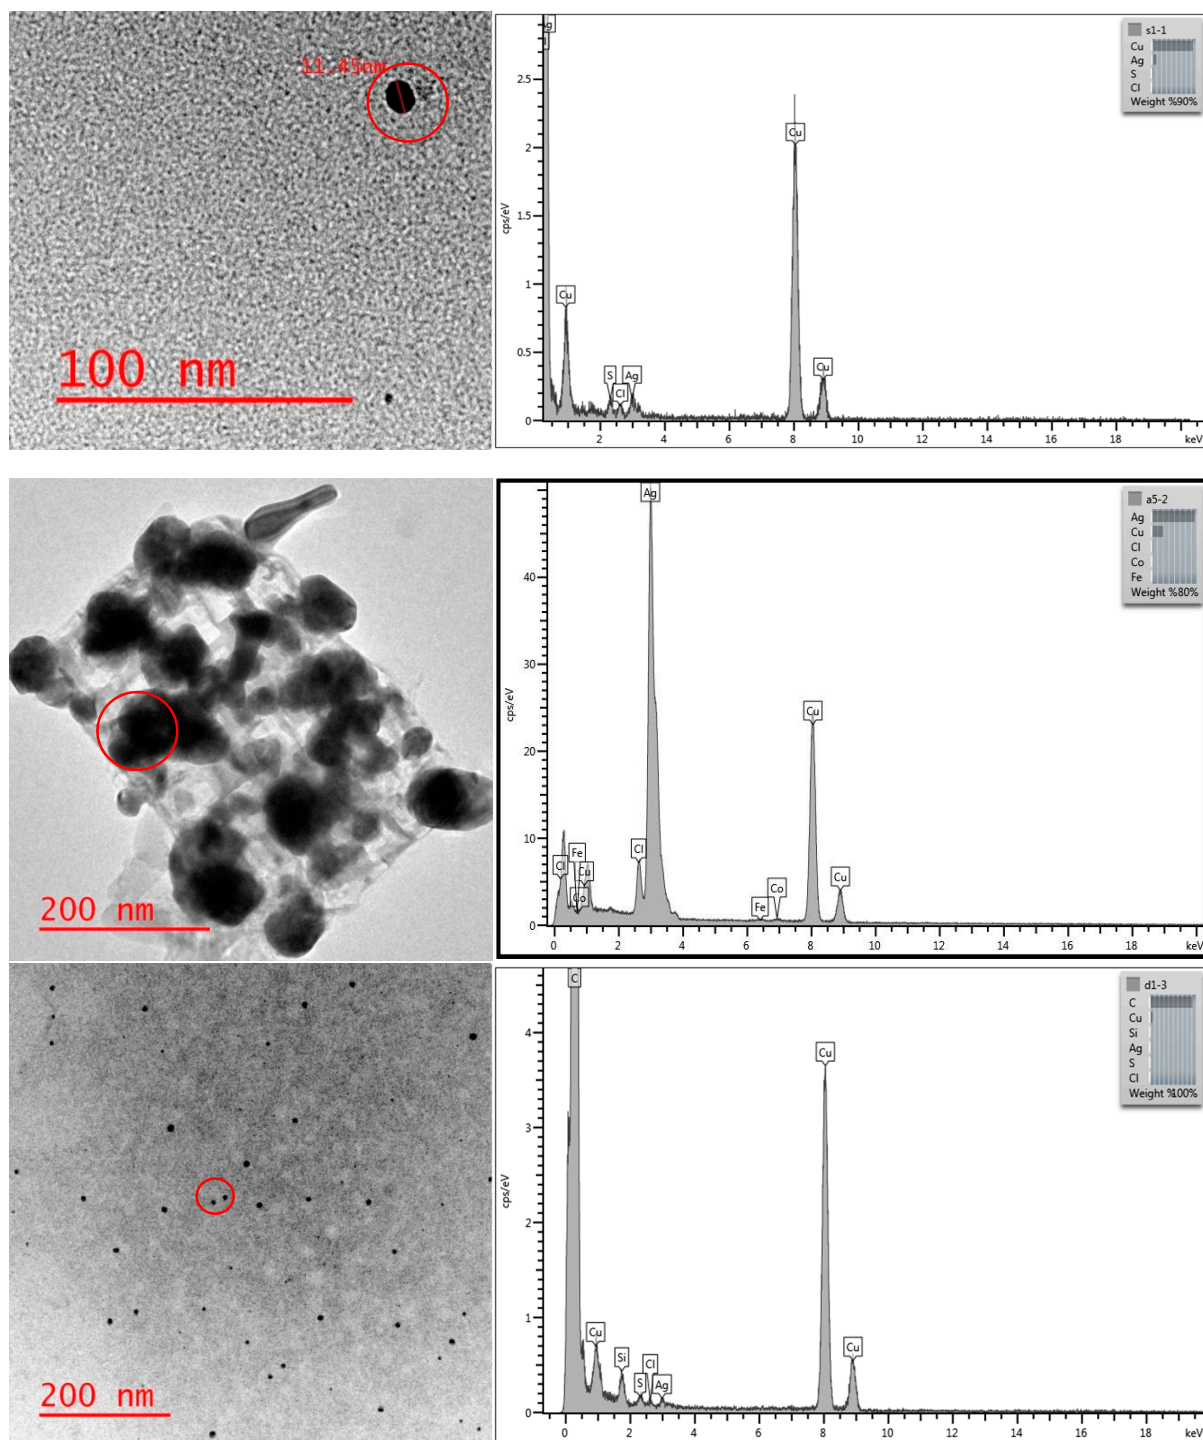

Figure S1: TEM image and EDS data of extracted samples from laboratory-prepared socks exposed to a) sweat b) bleach, c) detergent. Circles indicate areas probed for EDS.

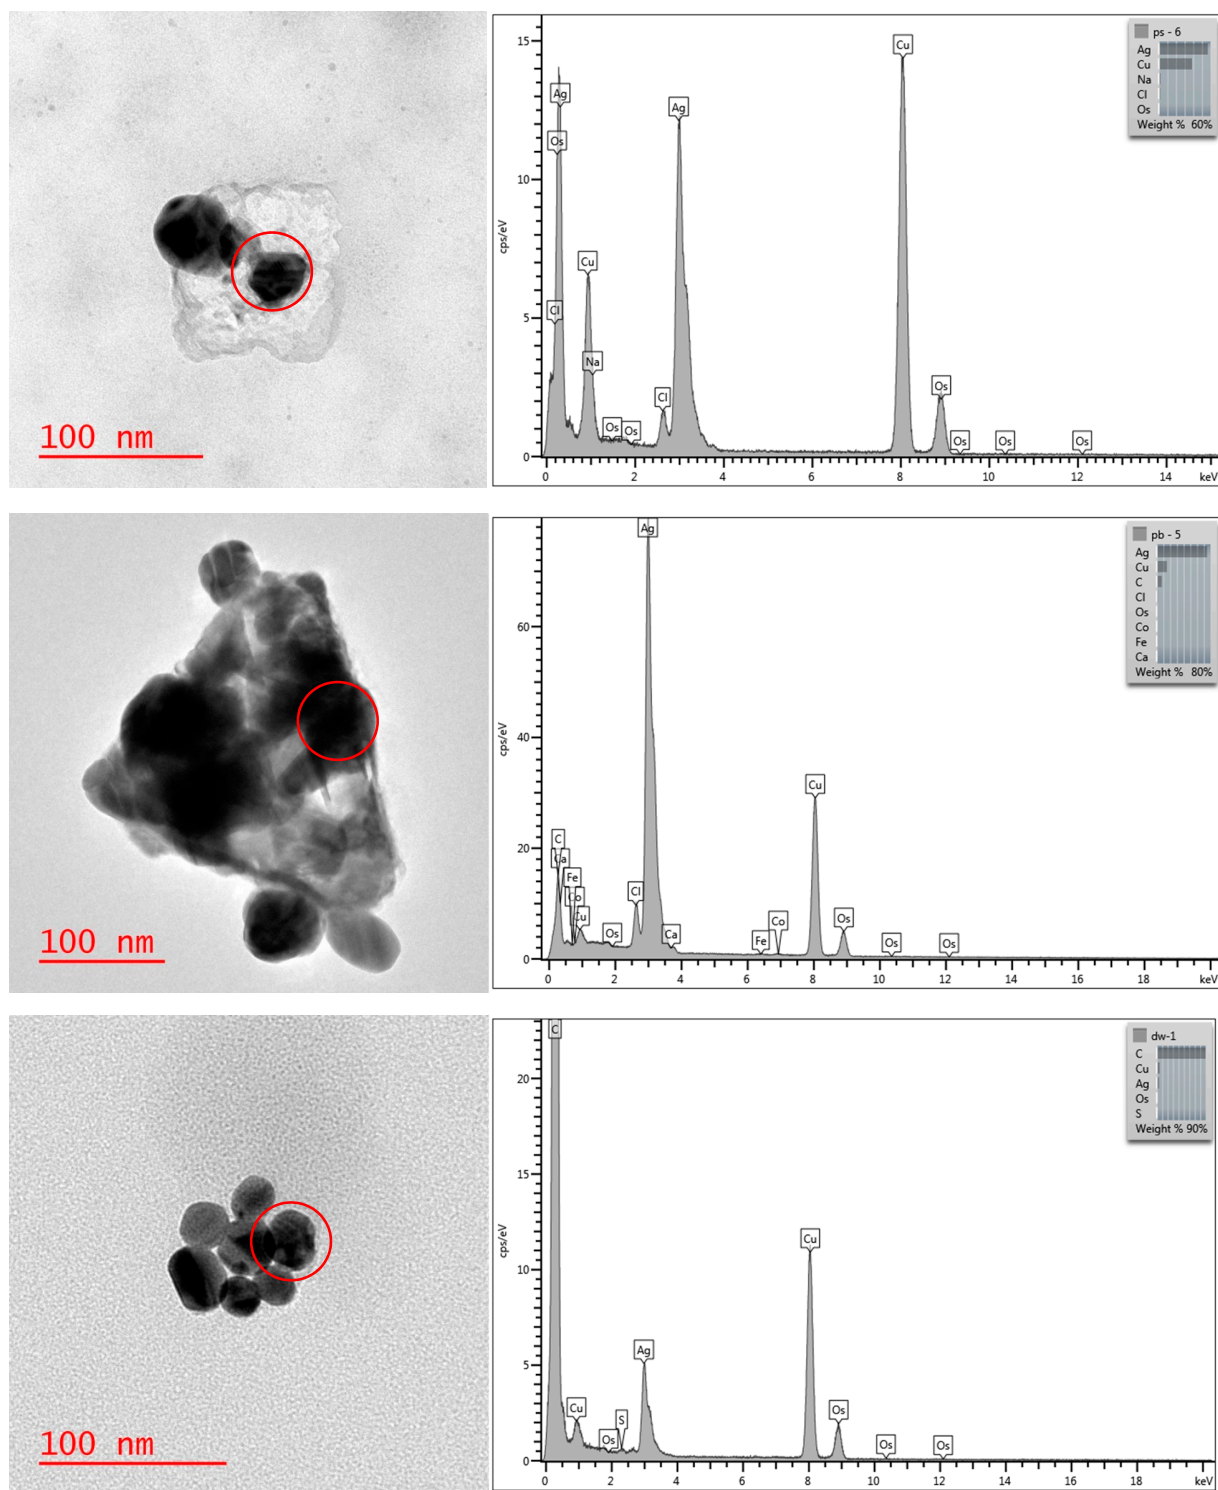

Figure S2: TEM image and EDS data of pristine NPs weathered with a) sweat b) bleach and c) detergent. Circles indicate areas probed for EDS.

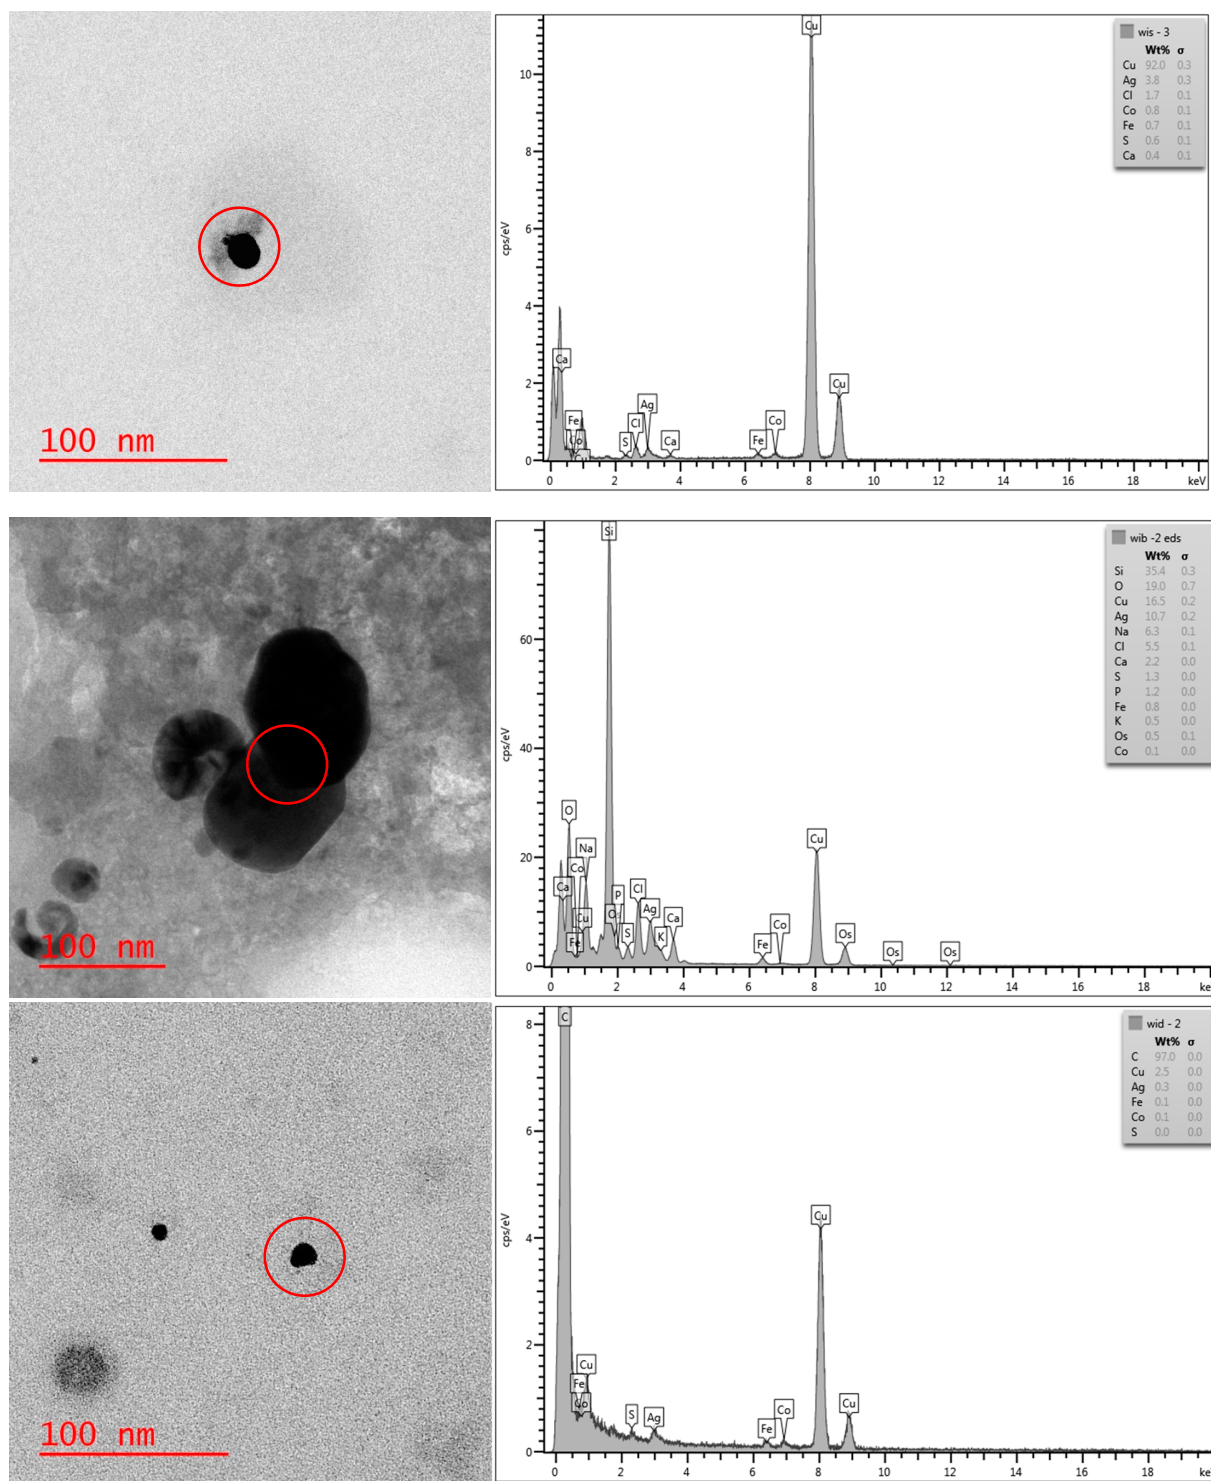

Figure S3: TEM image and EDS data of extracted samples from a) sweat b) bleach c) detergent solutions after treatment with wastewater. Circles indicate areas probed for EDS.



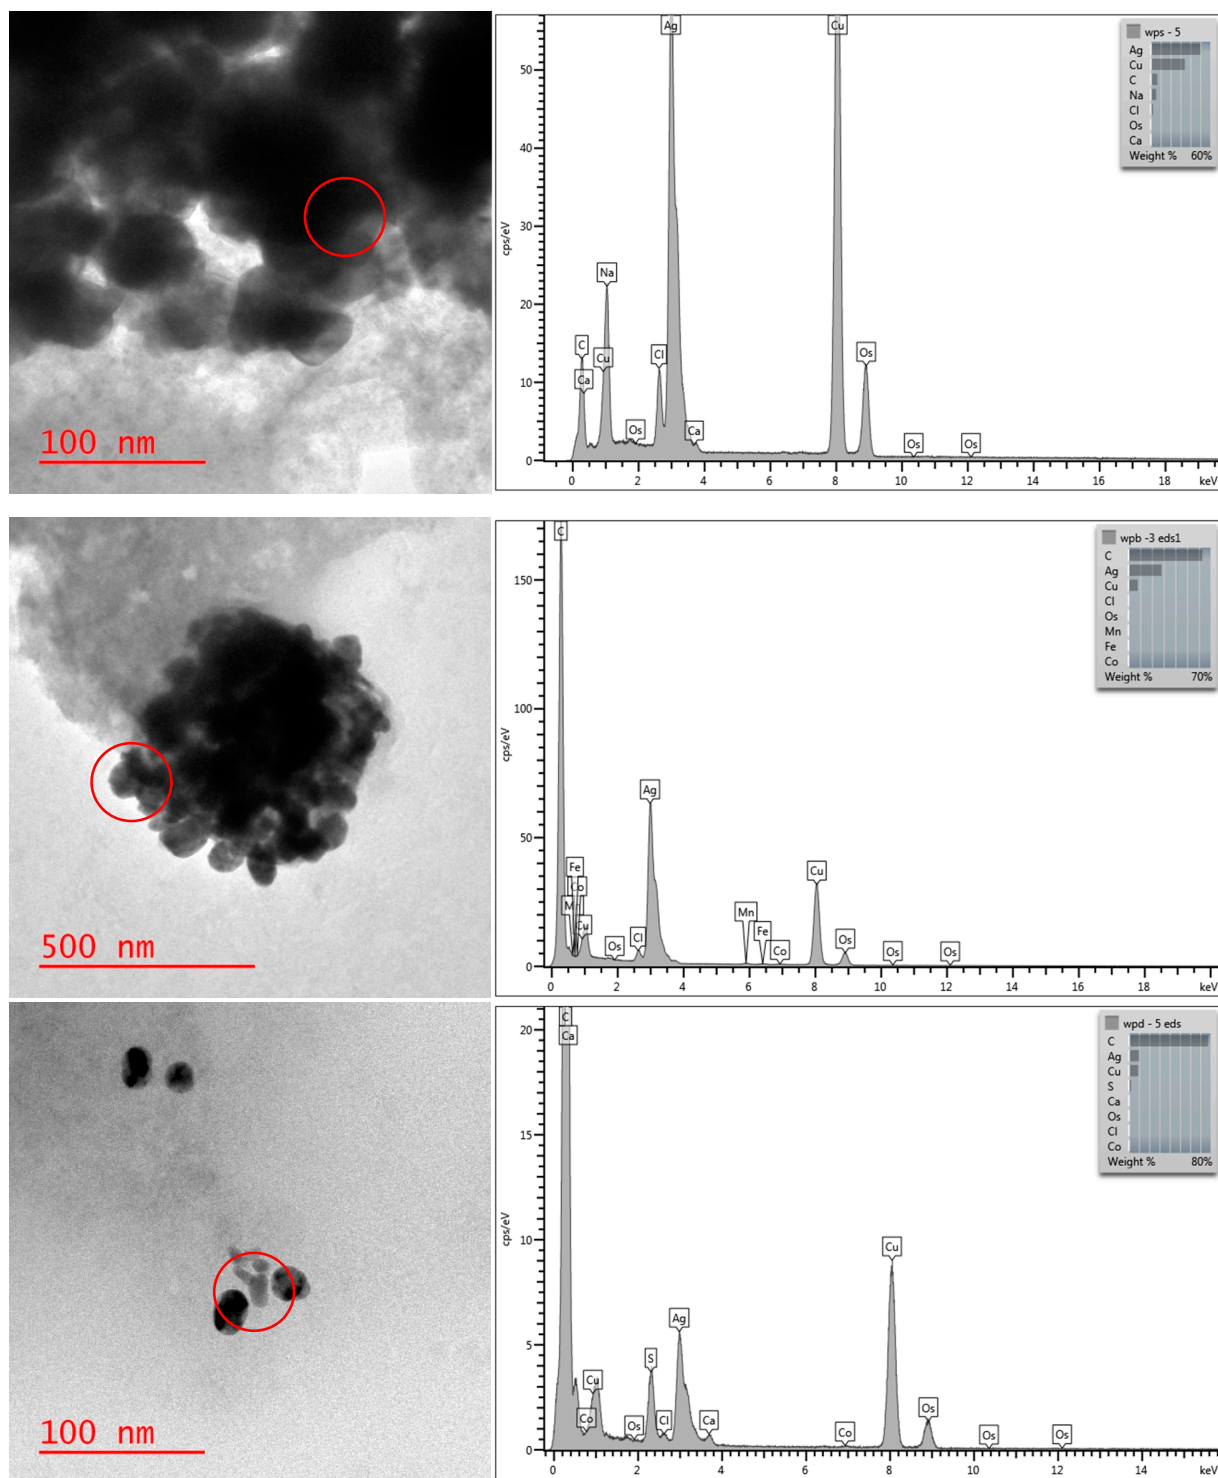

Figure S4: TEM image and EDS data of pristine NPs treated with wastewater after weathering with a) sweat b) bleach c) detergent. Circles indicate areas probed for EDS.

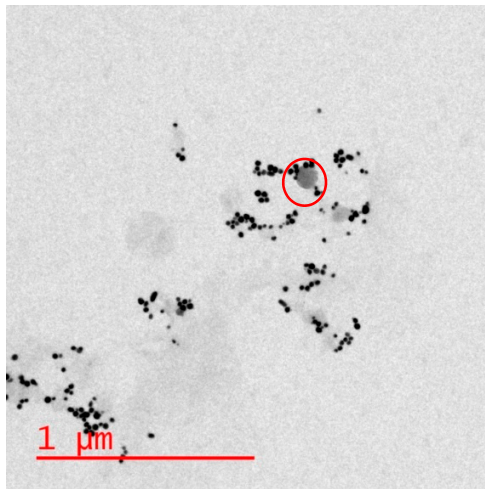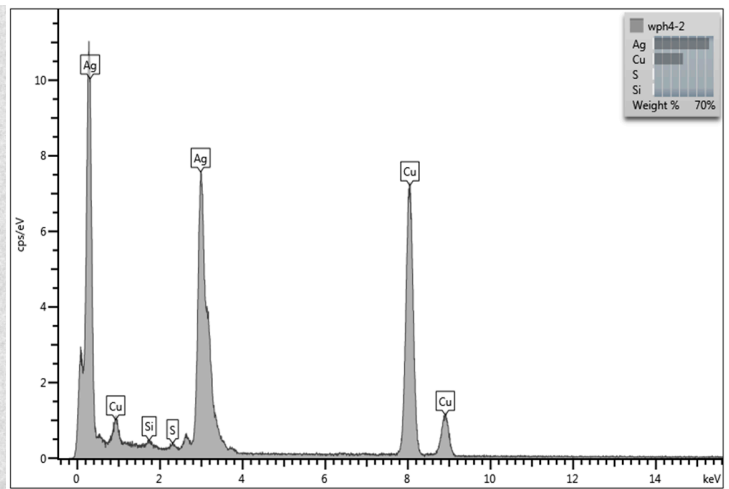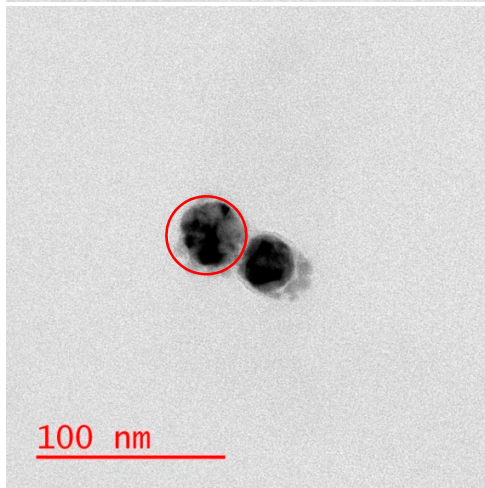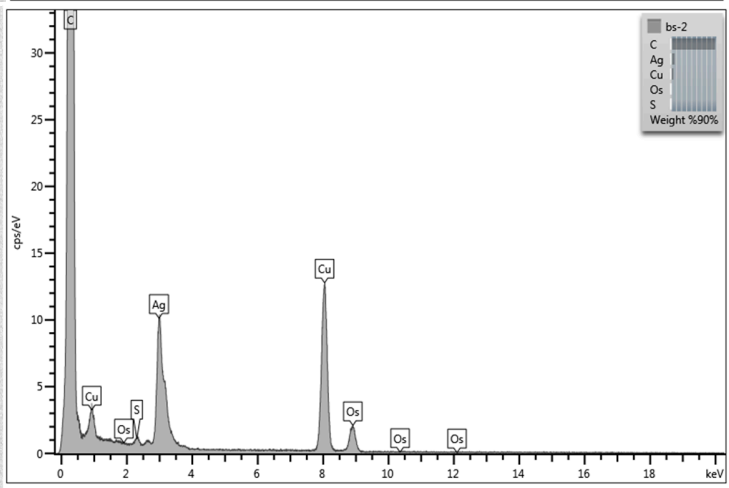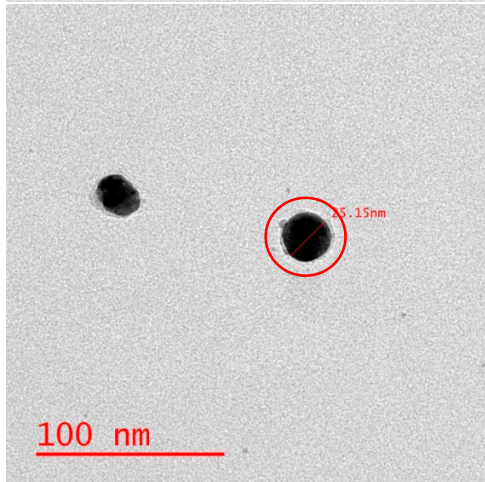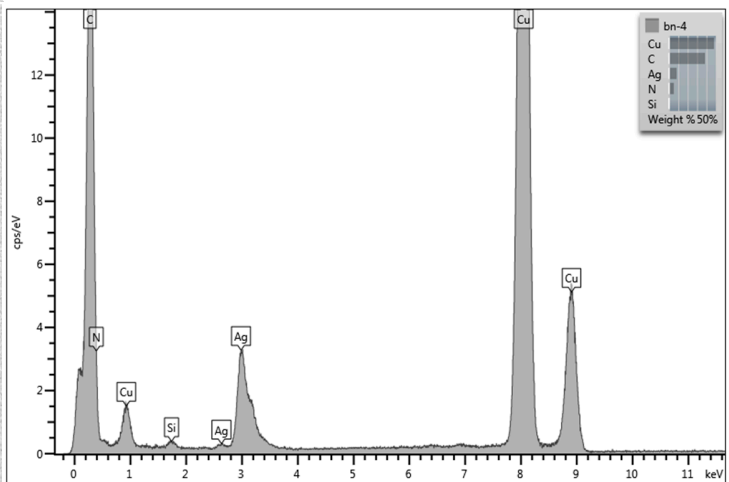

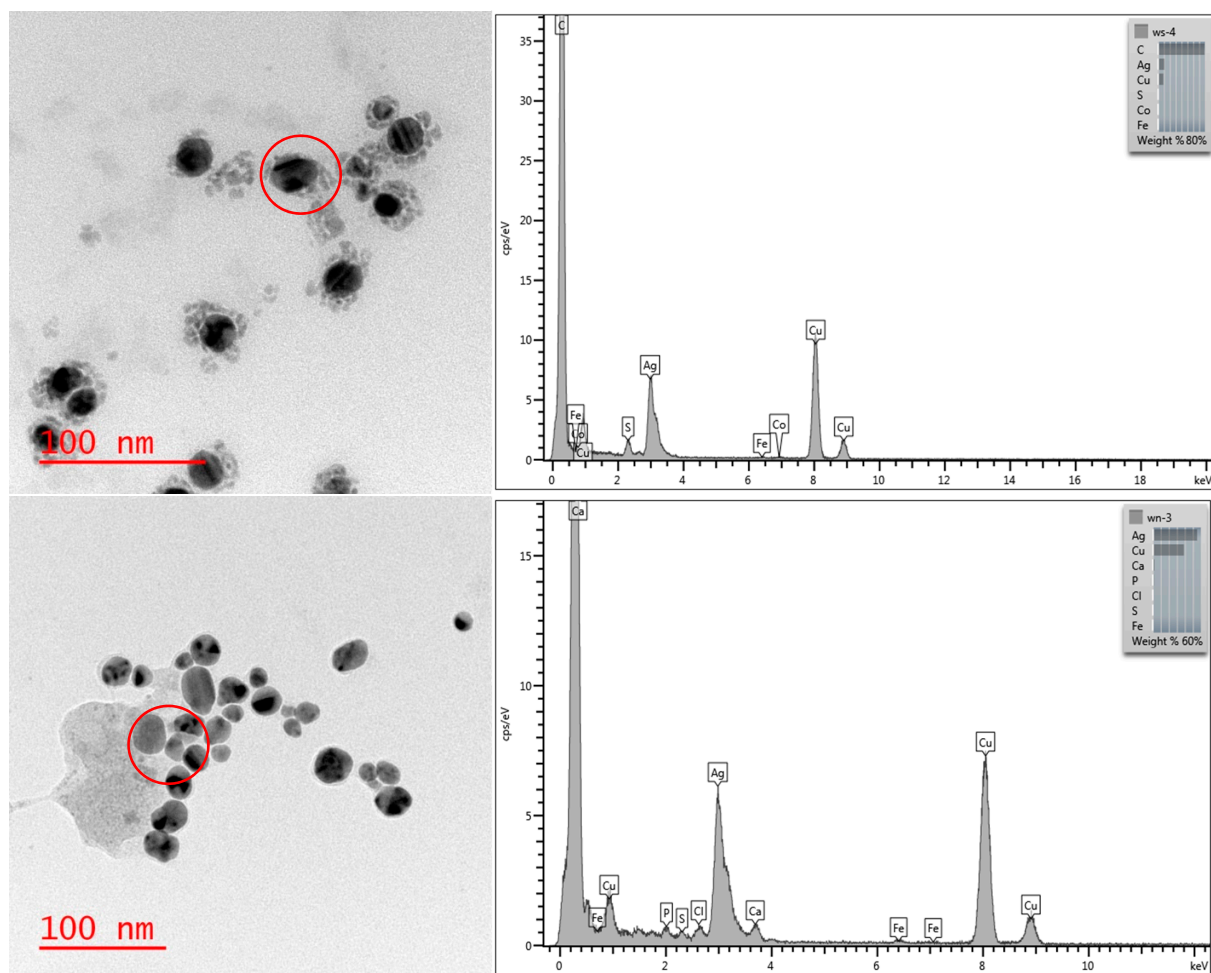

Figure S5: TEM image and EDS data of pristine AgNPs in a) wastewater b) sulfur-rich solution c) nitrogen-rich solution d) wastewater + sulfur-rich solution e) wastewater + nitrogen-rich solution. Circles indicate areas probed for EDS.

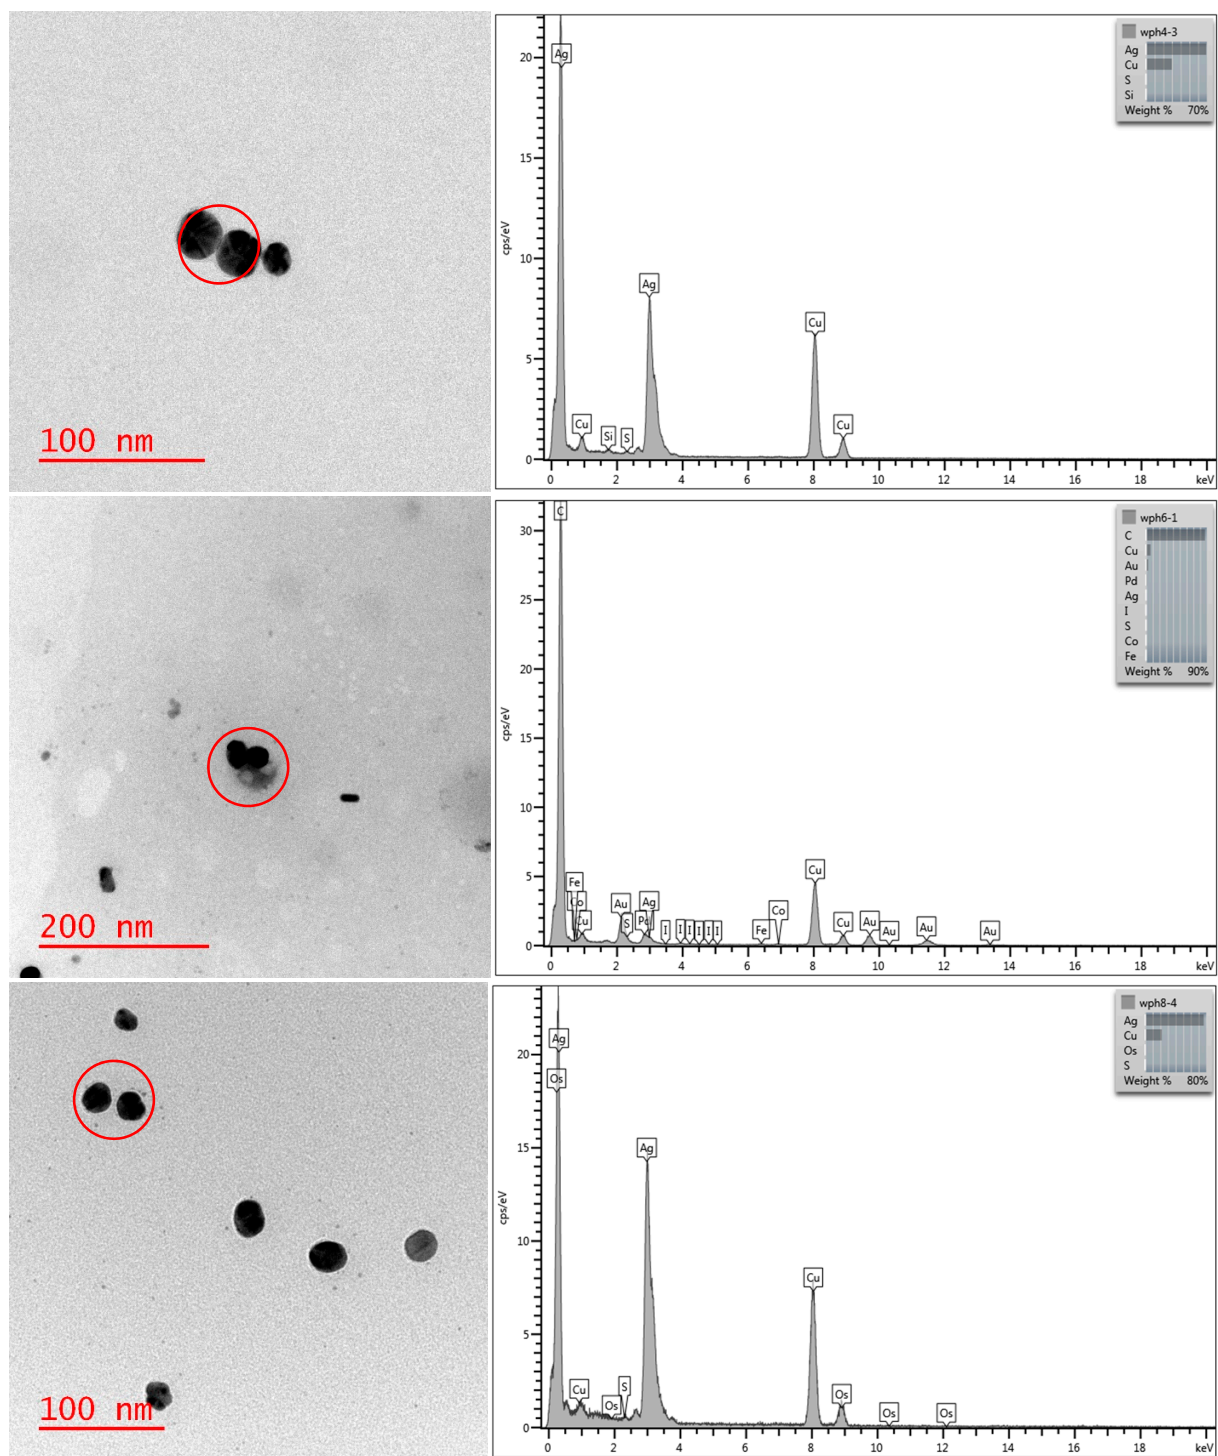

Figure S6: TEM image and EDS data of pristine AgNPs in wastewater with pH altered to a) pH 4.0 b) pH 6.0 c) pH 8.0. Circles indicate areas probed for EDS.
